# Supplementary material
Source: PubMed Central journal article supplement (PMC4028065)
Supplement: NIHMS17908-supplement-SI_-_isomotuporin-wegerski.pdf [file NIHMS17908-supplement-SI_-_isomotuporin-wegerski.pdf]

**A Serendipitous Discovery of Isomotuporin-Containing Sponge Populations of  
*Theonella swinhoei***

[Motuporin\_v 4.0]

Christopher J. Wegerski,<sup>†</sup> Joshua Hammond,<sup>†</sup> Karen Tenney,<sup>†</sup> Teatulohi Matainaho,<sup>§</sup> and Phillip Crews<sup>\*†</sup>

<sup>†</sup>*Department of Chemistry and Biochemistry & Institute of Marine Sciences, University of California, Santa Cruz, California 95064 USA* <sup>§</sup>*Discipline of Pharmacology, School of Medicine and Health Sciences, University of Papua New Guinea, National Capital District, Papua New Guinea.*

# Supporting Information

## Table of Contents

|                                                                                                                                                                                                         | <b>Page</b> |
|---------------------------------------------------------------------------------------------------------------------------------------------------------------------------------------------------------|-------------|
| <b>Figure S1.</b> <sup>1</sup> H NMR comparison of motuporin ( <b>1</b> ) and <i>isomotuporin</i> ( <b>2</b> ).....                                                                                     | S2          |
| <b>Figure S2.</b> Representation of gCOSY, gHMBC, and <sup>15</sup> N-HMBC correlations for <i>isomotuporin</i> .....                                                                                   | S3          |
| <b>Figure S3.</b> Advanced Marfey analysis of <b>2</b> , (a) hydrolysis product of <b>2</b> derivatized with L-FDLA and (b) hydrolysis product of <b>2</b> derivatized with both D-FDLA and L-FDLA..... | S4          |
| <b>Figure S4.</b> <sup>1</sup> H NMR of <i>isomotuporin</i> ( <b>2</b> ).....                                                                                                                           | S5          |
| <b>Figure S5.</b> <sup>1</sup> H NMR of <i>isomotuporin</i> B ( <b>3</b> ).....                                                                                                                         | S6          |
| <b>Figure S6.</b> <sup>1</sup> H NMR of <i>isomotuporin</i> C ( <b>4</b> ).....                                                                                                                         | S7          |
| <b>Figure S7.</b> <sup>1</sup> H NMR of <i>isomotuporin</i> D ( <b>5</b> ).....                                                                                                                         | S8          |
| <b>Figure S8.</b> Structures of compounds contained in Table 1.....                                                                                                                                     | S9          |
| <b>Figure S9.</b> Above and underwater photographs of all sponges studied.....                                                                                                                          | S10         |



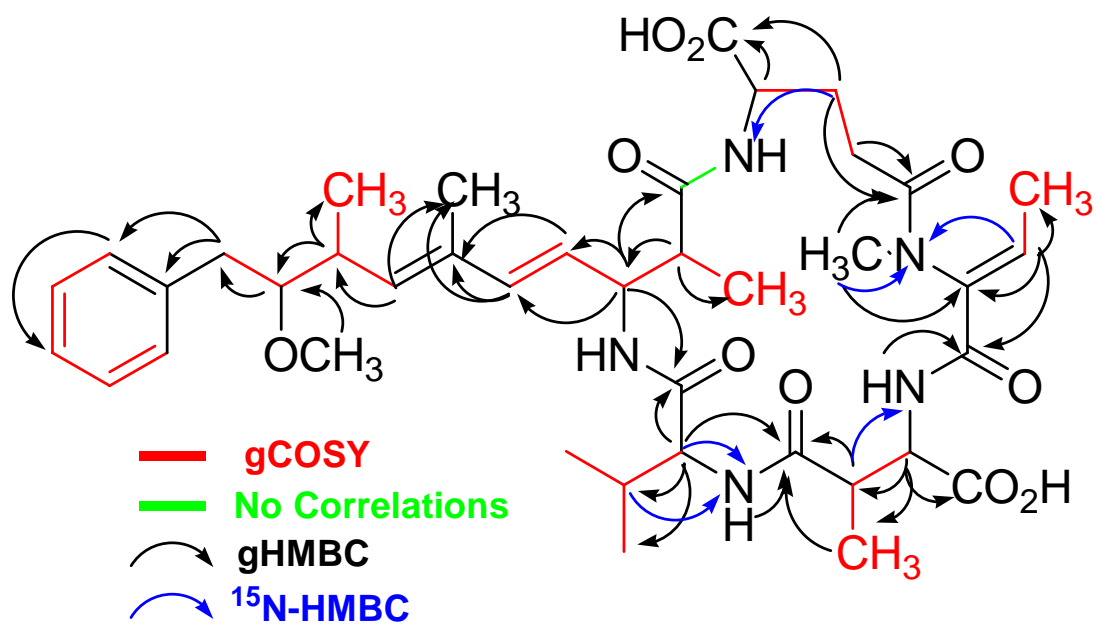

**Figure S2.** Representation of gCOSY, gHMBC, and <sup>15</sup>N-HMBC correlations for *isomotuporin* (**2**).

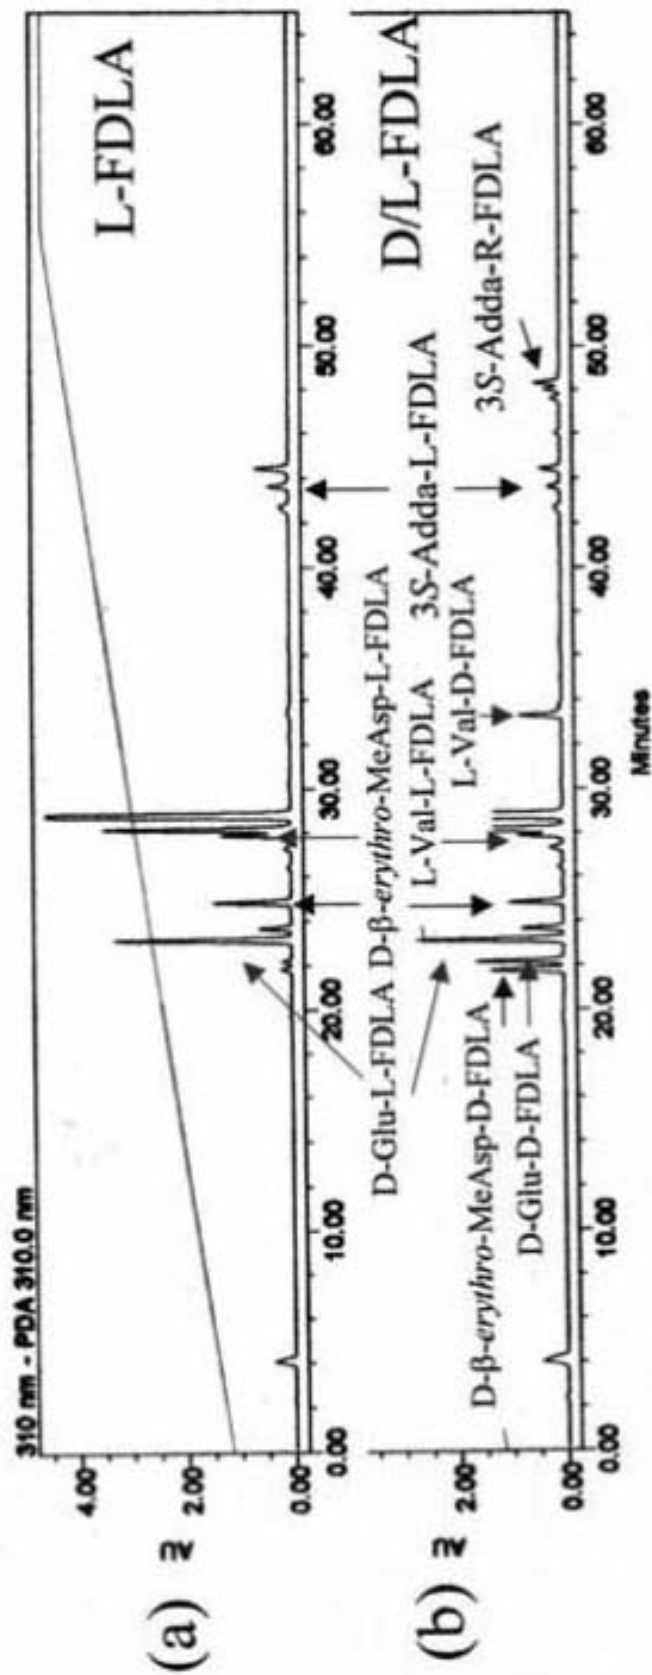

**Figure 3.** Advanced Marfey analysis of isomtoporin (**2**), (a) hydrolysis product of **2** derivatized with L-FDLA and (b) hydrolysis product of **2** derivatized with both D-FDLA and L-FDLA.

Figure S4.  $^1\text{H}$  NMR of *isomotuporin* (**2**).

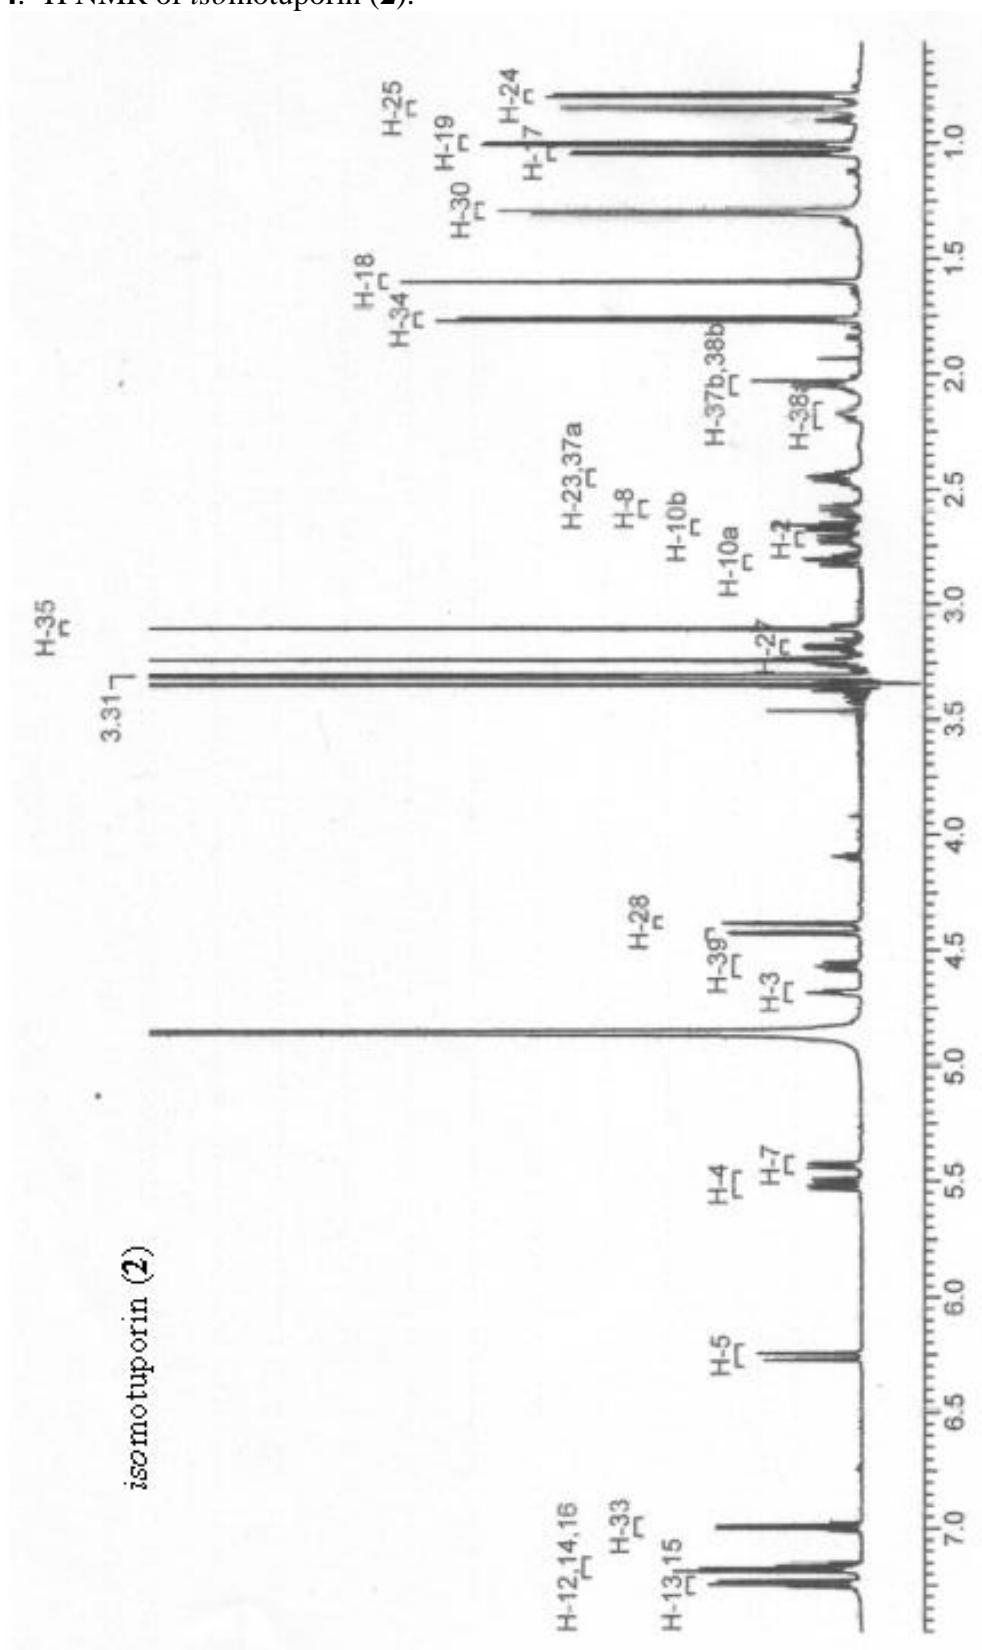

Figure S5.  $^1\text{H}$  NMR of *isomotuporin B* (**3**).

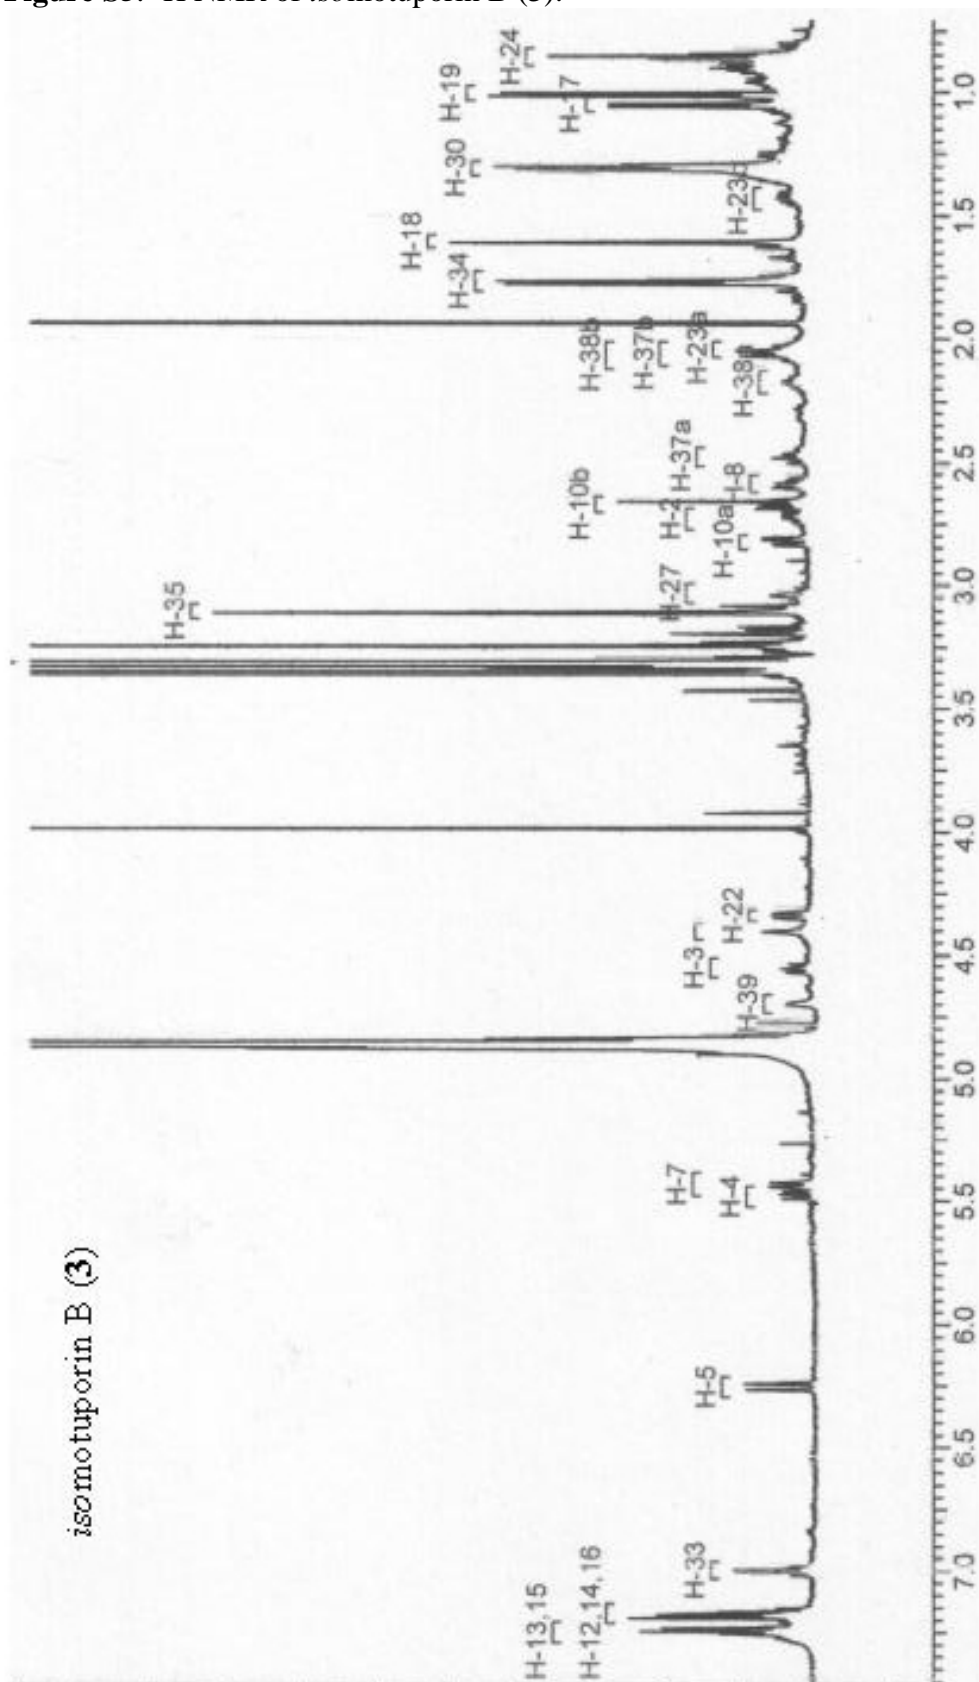

Figure S6.  $^1\text{H}$  NMR of Isomotuporin C (4).

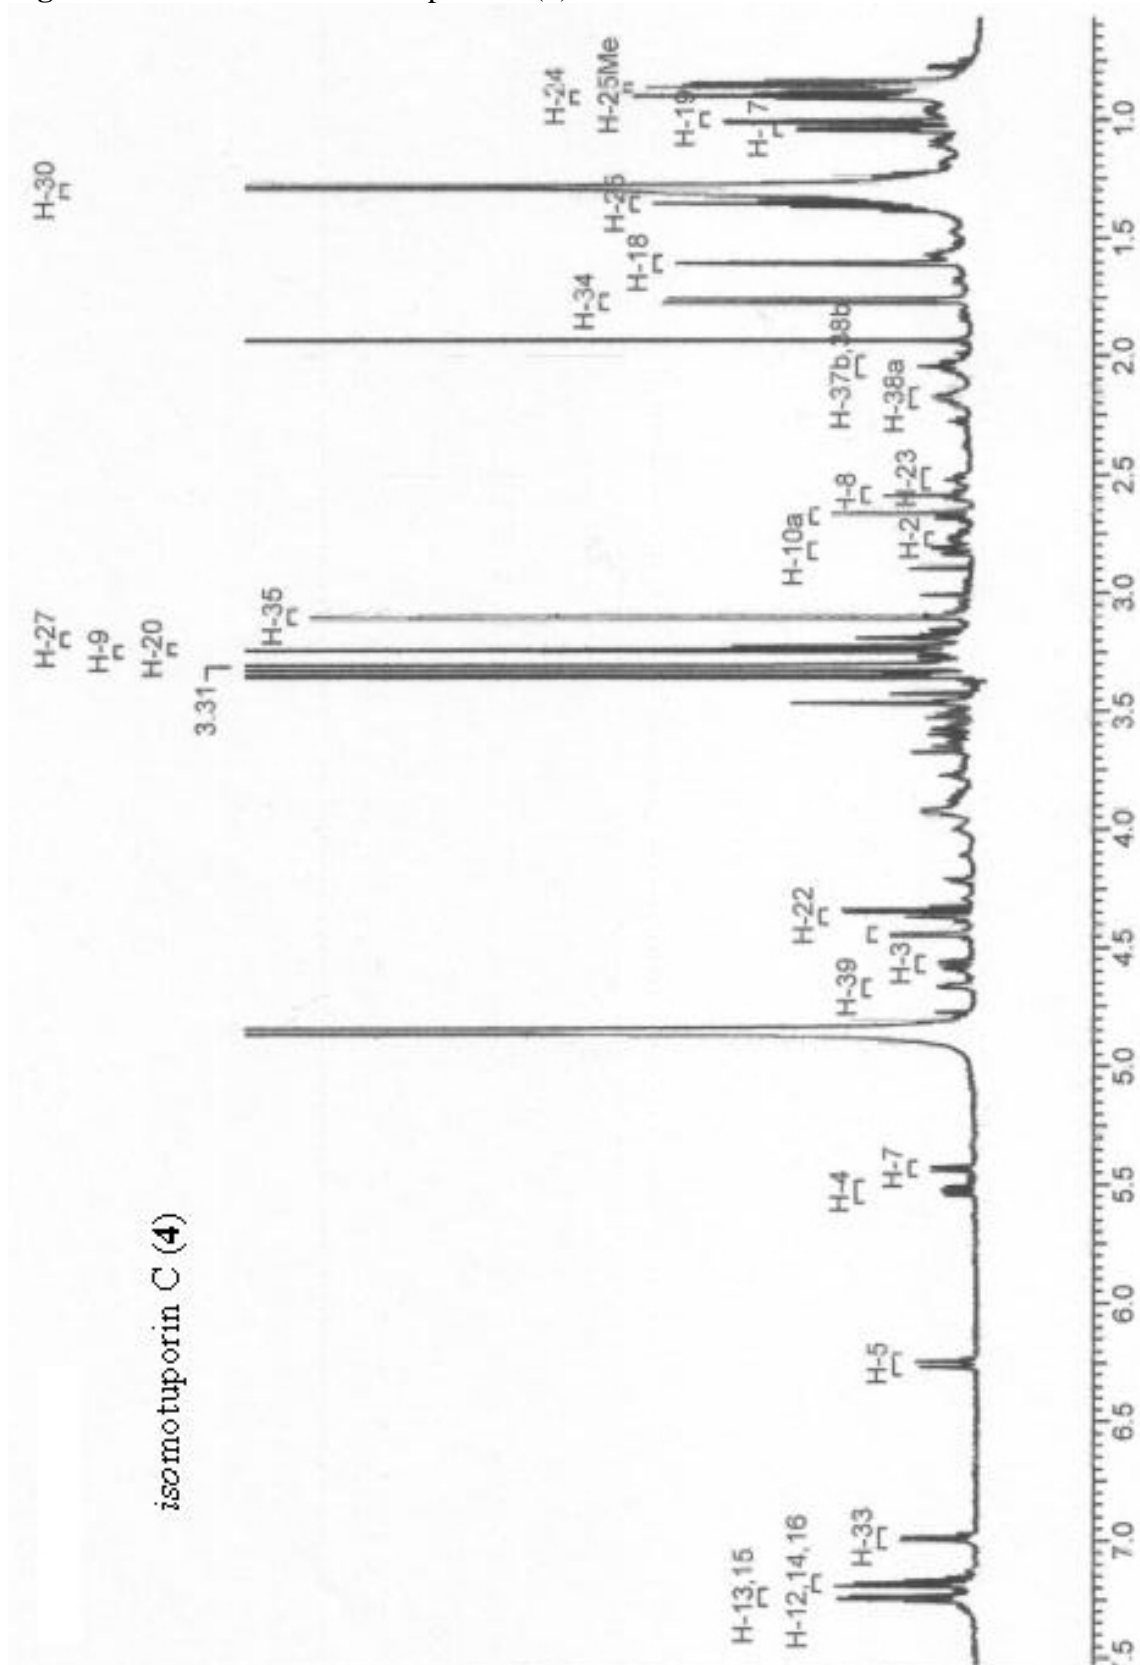

Figure S7.  $^1\text{H}$  NMR of isomotuporin D (5).

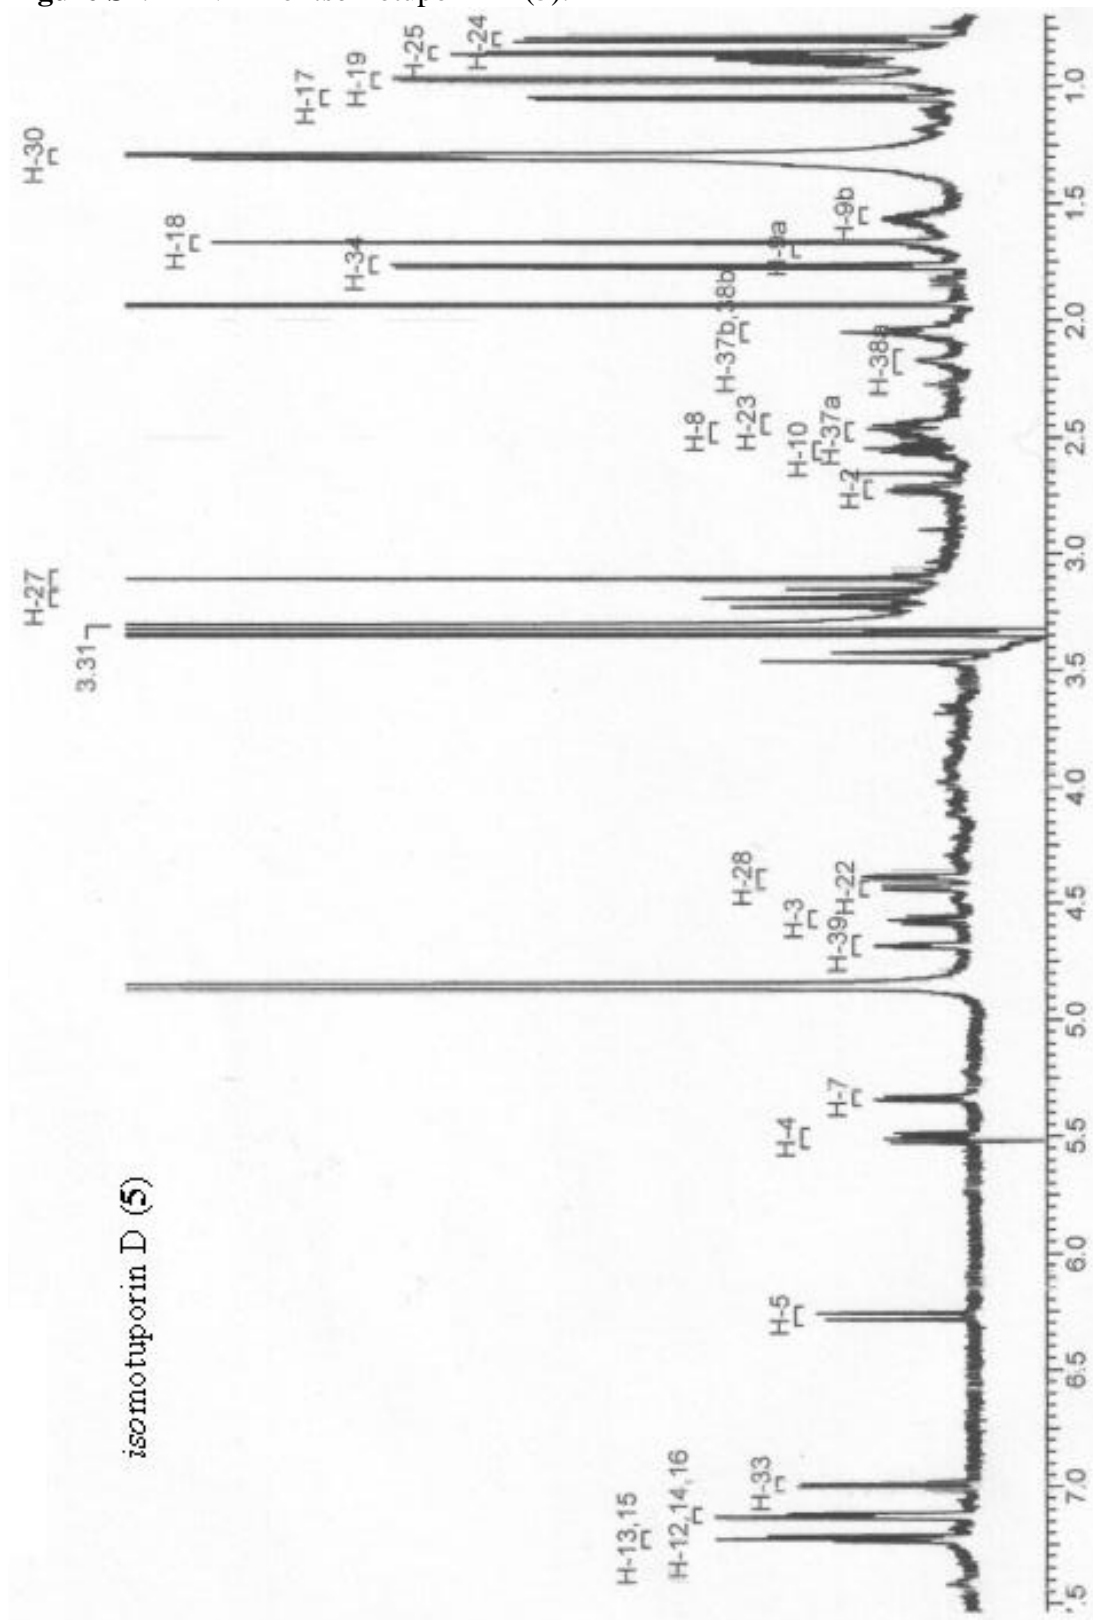



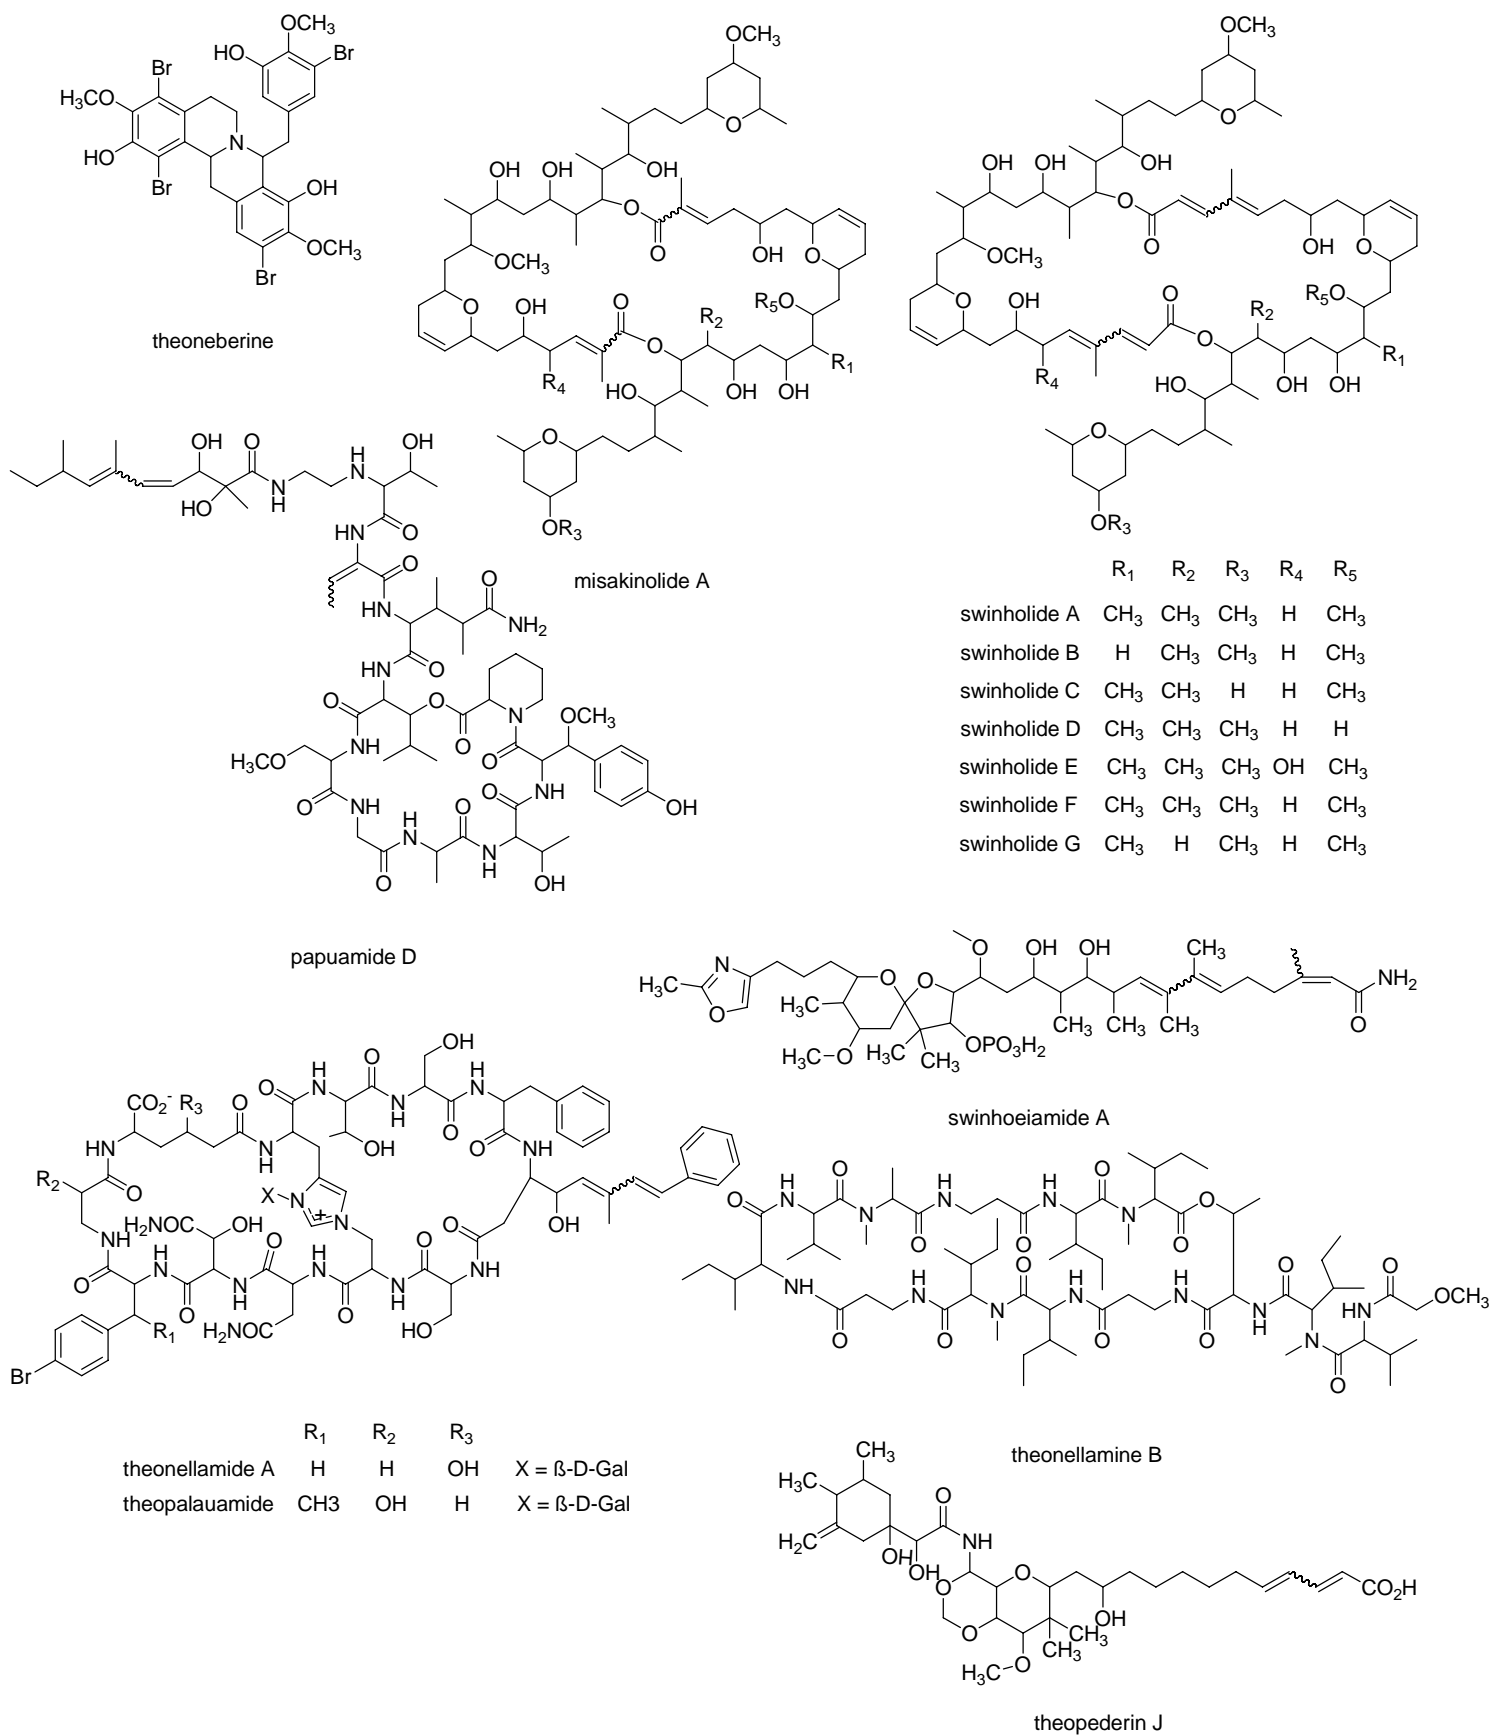

**Figure S8.** Structures of compounds contained in Table 1.

**Figure S9A.**

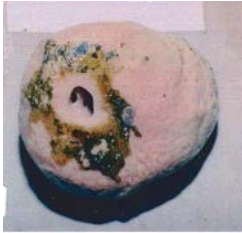

**94590 AW**

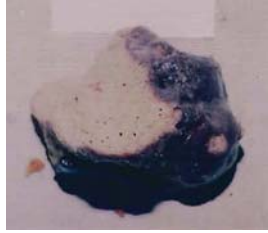

**94647 AW**

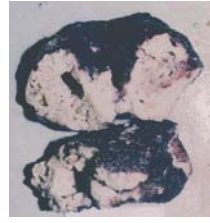

**94648 AW**

**NA**

**94590 UW  
94647 UW  
94648 UW**

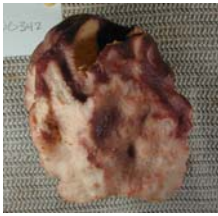

**00342 AW**

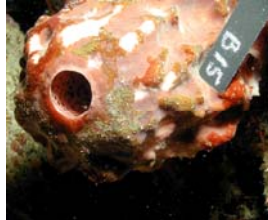

**00342 UW**

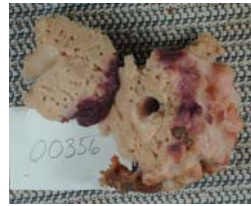

**00356 AW**

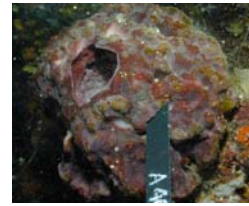

**00356 UW**

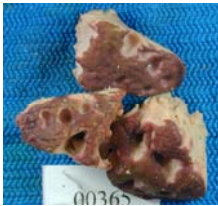

**00365 AW**  
**Figure S9B.**

**NA**

**00365 UW**

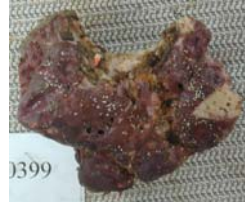

**00399 AW**

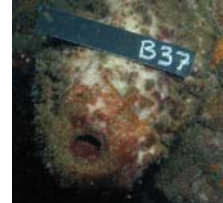

**00399 UW**

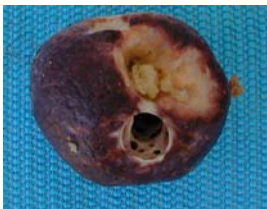

**02141 AW**

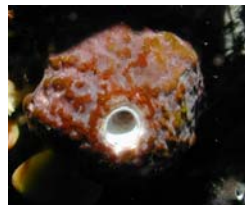

**02141 UW**

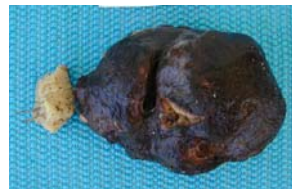

**02142 AW**

**NA**

**02142 UW**

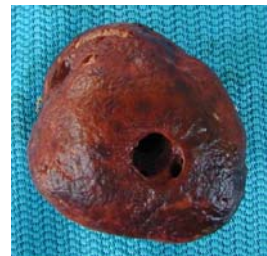

**03506 AW**

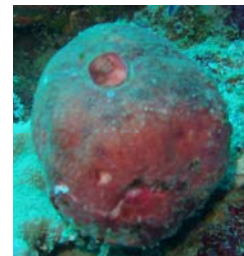

**03506 UW**

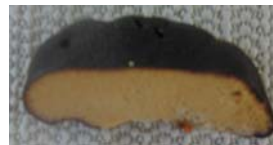

**05221 AW**

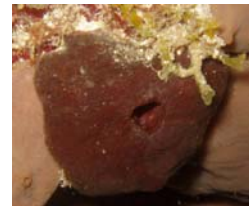

**05221 UW**

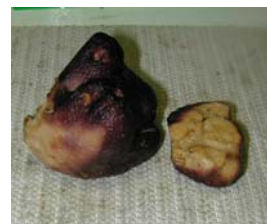

**05254 AW**

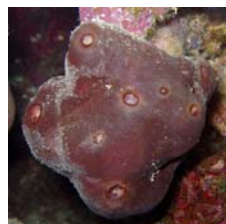

**05254 UW**

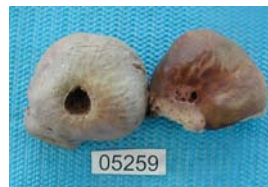

**05259 AW**

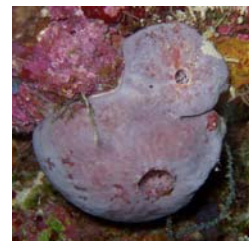

**05259 UW**
